# Supplementary material
Source: publisher figshare collection journal article supplement (https://rs.figshare.com/ndownloader/files/12481547)
Supplement: Supplementary file 1 [file 12481547]

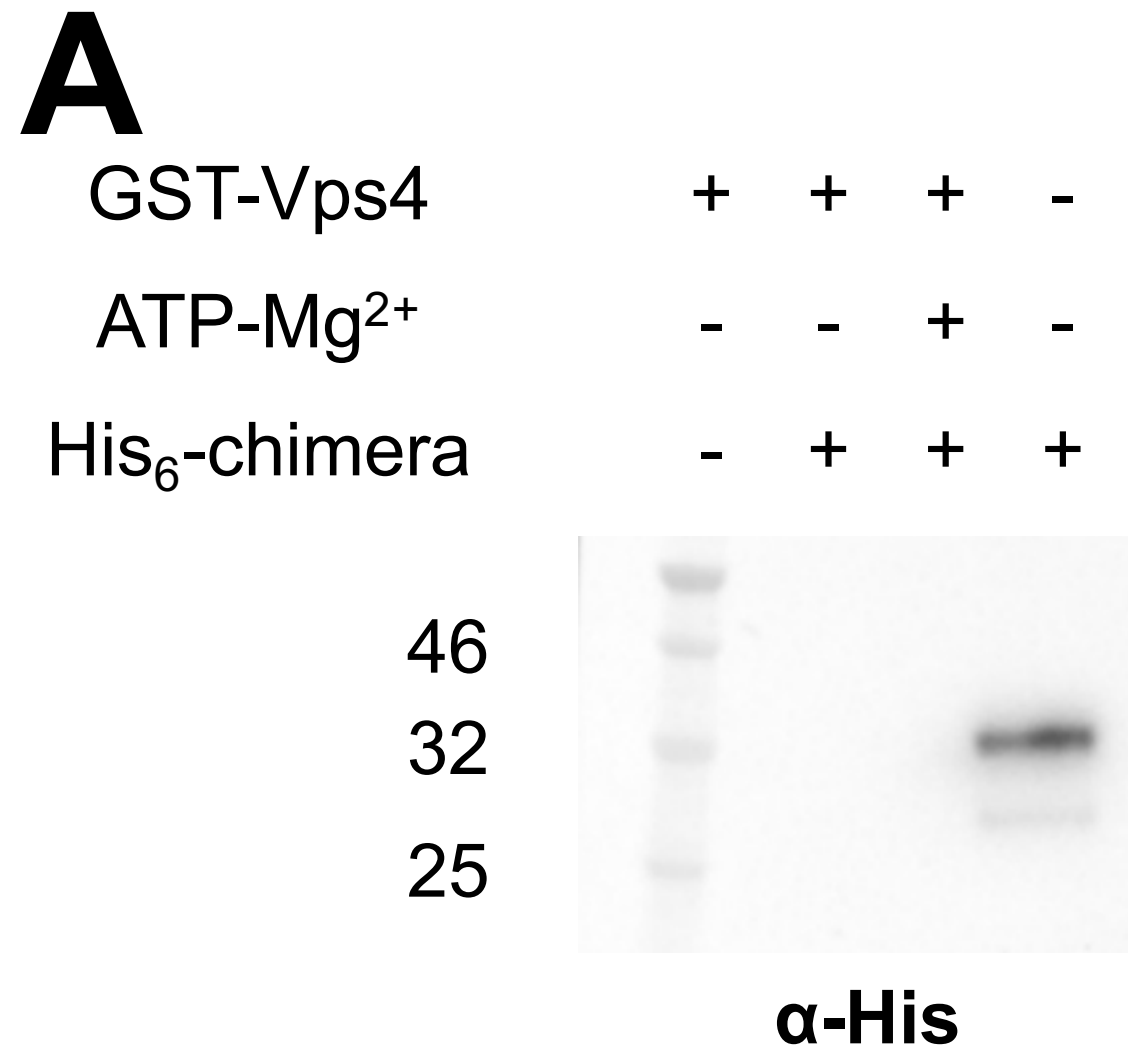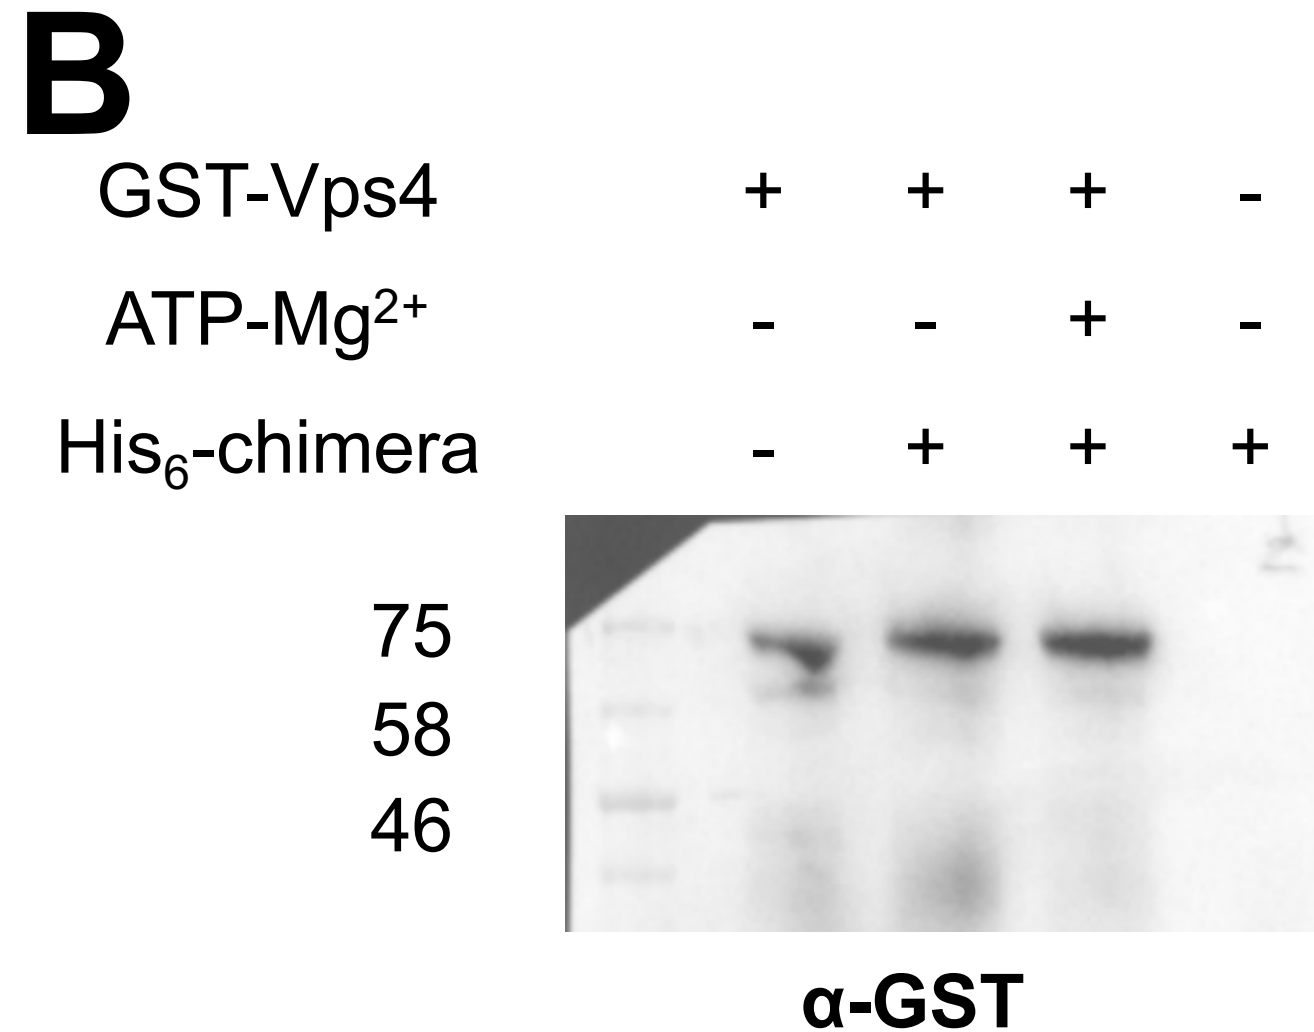

SUPPLEMENTARY FIGURE 1 – GST pulldown between histidine-tagged chimera (-) and GST-tagged Vps4 in the presence or absence of ATP-Mg<sup>2+</sup>. (A) Blot with anti-histidine tag antibody to visualise chimera (-). (B) Blot with anti-GST tag antibody to visualise Vps4. The successful binding of chimera (-) to Vps4 would be shown by chimera (-) bands appearing in lane 2 and 3 in (A).
